1       **Reaction of Hydrogen sulfide homeostasis genes under**  
2       **biotic and abiotic stress condition in rice – computational**  
3       **approach**

4  
5       **Ganesh Alagarasan<sup>1\*</sup> and Jegadeesan Ramalingam<sup>1\*</sup>**

6       <sup>1</sup>Department of Plant Molecular Biology and Bioinformatics, Centre for Plant Molecular Biology and  
7       Biotechnology, Tamil Nadu Agricultural University, Coimbatore, India

8       \*Corresponding author: [Alagarasan.ganesh@hotmail.com](mailto:Alagarasan.ganesh@hotmail.com), [ramalingam.j@tnau.ac.in](mailto:ramalingam.j@tnau.ac.in)

9  
10

11       **Abstract**

12       **Gaseous molecules are widespread signaling compounds, regulating the cell**  
13       **development process in all major plant parts. For many decades, hydrogen sulfide**  
14       **molecule is considered mainly for its deleterious effects on plant system. The increasing**  
15       **recent experimental evidence and phenomenal concepts on H<sub>2</sub>S molecule further**  
16       **advance our understanding of H<sub>2</sub>S interaction with plant tissues. In addition, the H<sub>2</sub>S**  
17       **messenger molecule is found to have positive effects on plant growth, in limited**  
18       **condition, to maintain the balanced homeostasis. To meet the increasing demand, and**  
19       **to sustain the crop yield, various crop improvement programs have been followed.**  
20       **However, there is a concern that traditional plant improvement method and increasing**  
21       **climate change has a negative impact on crop production. A major approach to**  
22       **combating plant stress is to evaluate and explore the alternate source mechanism(s).**

23 **Towards this aim, it will be valuable to characterize the genes involved in H<sub>2</sub>S**  
24 **homeostasis in the staple food crop rice pan-genome. In this research, we identified 15**  
25 **H<sub>2</sub>S homeostasis genes in rice and used it for the ~3k rice pan-genome analysis to find**  
26 **out the genetic relatedness based on single nucleotide polymorphism data.**  
27 **Multidimensional scale plot of 15 H<sub>2</sub>S homeostasis genes among the rice cultivars, and**  
28 **RNA-seq experimental data analysis under various biotic and abiotic stress shows the**  
29 **functional genes involved in biotic and abiotic stress. This study provides new insights**  
30 **into plant stress management in crop breeding and suggests how H<sub>2</sub>S gene(s) can be**  
31 **utilized to improve the agronomic traits in rice and other food crops.**

32

### 33 **Keywords**

34 Hydrogen sulfide, gaseous homeostasis, plant stress, crop improvement, toxicity.

35

### 36 **Introduction**

37 Rice, maize, wheat and tapioca are important staple food crop across the world and these  
38 crops faces many challenges to attain its full genetic potential. Further, the combinatorial  
39 stress and standalone plant stress like salinity and drought are reducing the production and  
40 productivity potential of almost every food crop (Suzuki et al., 2014). Research projects with  
41 a focus on genetic and molecular analysis of unexplored functional genes will be very useful  
42 in crop breeding to combat the plant stress. Hence, the plant stress research has witnessed an  
43 increased attention, due to climate change, and continuous evolution of more virulent biotic  
44 and abiotic stress factor.

45 H<sub>2</sub>S homeostasis is an important source of mechanisms to tolerate the plant stress (Romero et  
46 al., 2014; Mostofa et al., 2015b; Dai et al., 2017; Tain et al., 2017). Recently, Mostofa et al.  
47 (2015b) reported the physiological implications of hydrogen sulfide in rice tissues under  
48 salinity stress. They have analyzed and discussed the effect of exogenous application of H<sub>2</sub>S  
49 and its effect on plant growth, particularly by maintaining a Na<sup>+</sup>/K<sup>+</sup> ratio. The physiological  
50 functions of H<sub>2</sub>S in plants are mediated by sulfur-oxidation pathways (Mishanina et al.,  
51 2015), and different molecular targets, such as different ion channels, sulfate transporters and  
52 signaling proteins (Wang, 2012). In plants, the exogenous/endogenous hydrogen sulfide is  
53 responsible for conferring tolerance to both the biotic and abiotic stress (Bloem et al., 2004;  
54 Shi et al., 2015; Mostofa et al., 2015b). In every growth stage, plants do produce H<sub>2</sub>S in the  
55 cytosol through enzymatic mechanisms, particularly desulfhydrases. However, the H<sub>2</sub>S  
56 molecule also has the lethal effect on plant tissues at higher concentrations. Therefore, it is  
57 important to evaluate the potential of H<sub>2</sub>S gene in applied aspects before using it in crop  
58 breeding program. To explore the characteristic features and behavioral pattern of H<sub>2</sub>S  
59 homeostasis genes in biotic and abiotic stress, we have performed this study in rice H<sub>2</sub>S  
60 genes.

61  
62 In this study, we focused to elucidate the role of H<sub>2</sub>S homeostasis genes under biotic and  
63 abiotic stress through combined computational genomics approach. Based on previous  
64 physiological experimental evidence (Mostofa et al., 2015a; Chen et al., 2017; Duan et al.,  
65 2015; Mostofa et al., 2015b), we have determined our gene identification and analysis criteria  
66 to characterize the H<sub>2</sub>S homeostasis genes in rice. The reason for selecting the genes from a  
67 different category of hydrogen sulfide activity is mainly to maintain the balanced H<sub>2</sub>S

68 content in plants. Since the higher H<sub>2</sub>S content will lead to tissue toxicity in rice, it is better  
69 to introgress, and/or clone the H<sub>2</sub>S homeostasis genes.

70 Despite the availability of multiple completely sequenced rice genomes, little is known  
71 on the occurrence of H<sub>2</sub>S in rice. Cultivated rice does not have all agriculturally desirable  
72 traits, which they might have lost during segmental, and/or tandem duplication events. As the  
73 wild rice contains many desirable traits, it is important to mine alleles from wild rice. ~3k  
74 rice genome project sequencing project made it possible to use the potential genes(s) from  
75 wide range of rice germplasm. Here we present the pan-genome analysis of the H<sub>2</sub>S  
76 homeostasis genes extended across the largest part of *Oryza* phylogeny using sequencing  
77 data from the 3k rice genome project.

78

## 79 **Materials and methods**

### 80 **Comparative analysis of H<sub>2</sub>S homeostasis genes in rice**

81 The keywords viz., sulfite reductase, cysteine synthase, cyanoalanine synthase and cysteine  
82 desulphydrase were searched in the Gramene and multiple rice database to retrieve the full-  
83 length gene sequences. Redundant results were filtered out for further downstream analyses.

84 The retrieved gene sequences were manually annotated with FGENESH  
85 (<http://www.softberry.com/>). The annotated sequences were cross-checked in the public  
86 databases. The identified genes were positioned on their respective chromosome using the  
87 Oryzabase database. Number of intron and exons in the H<sub>2</sub>S genes were predicted in GSDS  
88 (<http://gsds.cbi.pku.edu.cn/>). The FGENESH derived protein sequences were subjected to  
89 conserved domain analysis in NCBI-CDD, Pfam identifiers, HMMER to confirm the  
90 presence H<sub>2</sub>S homeostasis domains. These protein sequences were used for Phylogenetic

91 classification of H<sub>2</sub>S homeostasis genes through W-IO-TREE  
92 (<http://iqtree.cibiv.univie.ac.at/>) server with default parameters. Protein topology and signal  
93 peptides were predicted through Protter. To find the potential miRNA targets, the gene  
94 sequences were scanned in psRNATarget (<http://plantgrn.noble.org/psRNATarget/>) server.  
95 The association between the potential miRNA expression with agronomic traits was done in  
96 RiceATM (<http://syslab3.nchu.edu.tw/rice/>). Rice pan-genome analysis was performed in the  
97 rice SNP seek database (<http://snp-seek.irri.org/>) to determine the genetic distance of ~3k rice  
98 genotypes based on H<sub>2</sub>S genes. For promoter analysis, 2 kb upstream of all gene sequences  
99 was subjected to transcription factor analysis in PlantPAN database. Whole genome RNA-  
100 seq data were used to determine the expression of fifteen H<sub>2</sub>S in various abiotic stress  
101 phosphorus stress (PRJEB11899); drought stress and salinity stress (GSE60287). To compare  
102 the H<sub>2</sub>S gene expression level in biotic stress, bacterial blight (GSE57670) transcriptome data  
103 were used to generate the FPKM value. The obtained FPKM value was used to generate the  
104 heat map to quantify the transcript abundance.

105

## 106 **Results**

### 107 ***In silico* functional characterization of H<sub>2</sub>S gene family**

108 To comprehensively investigate and characterize the H<sub>2</sub>S gene family in rice, a genome-wide  
109 survey covering the entire length of all the 12 rice chromosomes were performed. The hidden  
110 Markov model and keyword-based and search in Gramene and rice genome annotation  
111 database resulted in the identification of 15 potential full-length H<sub>2</sub>S homeostasis related  
112 genes. The H<sub>2</sub>S homeostasis genes identified in the rice genome database and their features  
113 are mentioned in (Table). The chromosomal localization analysis of rice H<sub>2</sub>S genes revealed

114 variable distribution of the genes in all chromosomes except for chromosome 7, 8, 9, 10 and  
115 11. While a maximum number of four genes were located on chromosome 1 and 6. In  
116 contrast, only one gene was identified in both the chromosome number 4 and 12. Of fifteen  
117 H<sub>2</sub>S genes, three (OsH<sub>2</sub>S12, OsH<sub>2</sub>S13 and OsH<sub>2</sub>S14) were defined as sulfite reductase, ten  
118 (OsH<sub>2</sub>S2, OsH<sub>2</sub>S3, OsH<sub>2</sub>S4, OsH<sub>2</sub>S5, OsH<sub>2</sub>S6, OsH<sub>2</sub>S7, OsH<sub>2</sub>S8, OsH<sub>2</sub>S9, OsH<sub>2</sub>S10 and  
119 OsH<sub>2</sub>S15) were defined as cysteine synthase and one as (OsH<sub>2</sub>S1) cyanoalanine synthase and  
120 another one as (OsH<sub>2</sub>S11) L-cysteine desulfhydrase. The H<sub>2</sub>S homeostasis family genes possess  
121 a small number of introns in their sequences (Figure 2).

122 Based on the results of Pfam, HMMER, CDD and Phylogenetic classification of conserved  
123 domain analysis, the H<sub>2</sub>S homeostasis genes were independently grouped as sulfite reductase,  
124 cysteine synthase, cyanoalanine synthase and cysteine desulfhydrase (Figure 1). Bzip, NAC,  
125 WRKY, MYB and AP2/EREBP are the predominant stress related transcription factor  
126 present in all the H<sub>2</sub>S genes promoter sequence. Of 15 H<sub>2</sub>S genes, only two genes (OsH<sub>2</sub>S2  
127 and OsH<sub>2</sub>S14) had a potential miRNA binding site (Figure 1). In total, seven miRNA (osa-  
128 miR818a, osa-miR818b, osa-miR818c, osa-miR818d, osa-miR818e, osa-miR1436 and osa-  
129 miR2879) targeting two genes have been identified. The miRNA (osa-miR818a, osa-  
130 miR818b, osa-miR818c and osa-miR818e) are found to strongly associated with the plant  
131 height and 1000 seed grain weight (osa-miR818b and osa-miR818b). In the surveyed ~3k  
132 rice accessions, 2757 accessions have all the 15 H<sub>2</sub>S homeostasis genes. The genes OsH<sub>2</sub>S3,  
133 OsH<sub>2</sub>S12 and OsH<sub>2</sub>S15 had a number of allelic variations across the surveyed rice pan-  
134 genome. The pan-genome analysis revealed a good genetic diversity analysis based on H<sub>2</sub>S  
135 sequences. This may help in selecting the donor plants with potential H<sub>2</sub>S alleles in plant

136 breeding programs. More number of indica type rice possess all the 15 genes, while the  
137 japonica rice has the second most number H<sub>2</sub>S genes.

138 To check the expression level of all 15 genes under P stress, salinity & drought stress and  
139 bacterial blight stress, the RNA-seq were analyzed (Figure 2). The differential expression  
140 pattern of H<sub>2</sub>S genes strongly supports the potential role of H<sub>2</sub>S homeostasis genes under  
141 various biotic and abiotic stress. For example, in IR 64 variety the cysteine synthase genes  
142 (OsH<sub>2</sub>S8 and OsH<sub>2</sub>S9) were up-regulated under drought stress. In Pokkali OsH<sub>2</sub>S1, OsH<sub>2</sub>S6,  
143 OsH<sub>2</sub>S10, OsH<sub>2</sub>S13 were up-regulated and OsH<sub>2</sub>S4, OsH<sub>2</sub>S5, OsH<sub>2</sub>S12 and OsH<sub>2</sub>S15 were  
144 highly down-regulated under salinity stress. Under biotic stress condition (bacterial blight),  
145 the genes OsH<sub>2</sub>S1, OsH<sub>2</sub>S3, OsH<sub>2</sub>S5 and OsH<sub>2</sub>S12 had a maximum level of expression.  
146 While in P stress, the genes OsH<sub>2</sub>S1, OsH<sub>2</sub>S3, OsH<sub>2</sub>S5, OsH<sub>2</sub>S12 and OsH<sub>2</sub>S15 had a  
147 maximum expression and OsH<sub>2</sub>S7 had a negligible/or low expression level. Among biotic  
148 and abiotic stress condition, the H<sub>2</sub>S genes expression is comparatively higher in P stress  
149 condition. Hence the research should be focused more on characterizing the H<sub>2</sub>S homeostasis  
150 genes under various P treatments in rice.

151

## 152 **Conclusion**

153 In this paper, an in-depth *insilico* gene characterization of the H<sub>2</sub>S family of rice was  
154 performed. We identified and characterized 15 H<sub>2</sub>S homeostasis genes in rice. The  
155 phylogenetic grouping of protein sequences confirmed the presence of conserved domains in  
156 the H<sub>2</sub>S related gene family. In addition, the presence of H<sub>2</sub>S gene family in seven  
157 chromosomes reflects the unequal distribution in the rice genome. Analysis of the promoter  
158 sequence, transcription factors and quantification of transcript abundance enabled the

159 retrieval of valuable information related to the functional response, diversity in the stress  
160 responsive elements and biotic/abiotic stress responsiveness of these genes. Finally, a  
161 comparative analysis between rice accessions revealed a high degree of sequence  
162 conservation/variation within the H<sub>2</sub>S domain as well as in the domain organization of these  
163 genes. Furthermore, analysis of the expression profiles of the H<sub>2</sub>S genes confirmed that they  
164 are differentially regulated in response to several types of stress. These data suggest a  
165 potential role for the H<sub>2</sub>Ss in plant signaling and defense mechanisms.

166

### 167 **Future direction of research**

168 Interestingly, Neale et al., (2017) reported that H<sub>2</sub>S signals produced from the plants have the  
169 ability to alter pathogenicity of microbes. The interaction between H<sub>2</sub>S genes and microbes,  
170 whether the triggered plant H<sub>2</sub>S genes are race-specific or race non-specific, and the genes  
171 and/or QTL controlling the specificity are needs to be clearly addressed. Research describing  
172 the reaction of plant H<sub>2</sub>S genes with specific microbial receptor protein will reflect the  
173 outcome of the interactions between alleles at all avirulence loci in the phyto-pathogen  
174 and alleles at all H<sub>2</sub>S loci of the plant gene. In addition, delineating the role of H<sub>2</sub>S directed  
175 regulation of abiotic stress responsive genes/QTLs/transcription factors will provide clues to  
176 the mechanisms controlling H<sub>2</sub>S homeostasis in plants. Further, the application of next-  
177 generation sequencing techniques will explore the presence of genotype specific novel  
178 INDEL region/SNPs in the H<sub>2</sub>S genes in plants. Some of the H<sub>2</sub>S genes have the signal  
179 peptide and are predicted to be involved in the secretory pathway. It would be interesting to  
180 see whether these signal peptides have any role in protein targeting and what happens if we  
181 truncate the signal peptide. It will also be motivating to observe the localization pattern of



182 H<sub>2</sub>S proteins. The current evidences on the role of signal peptides suggests that these proteins  
183 are secreted in some other cellular components, and being transported to inter-cellular  
184 spaces. Meanwhile, H<sub>2</sub>S genes have the potential to interact with other stress related genes  
185 (Wang, 2012). In addition, hydrogen sulfide has a positive effect on plant growth at various  
186 stress condition (Chen et al., 2013; Christou et al., 2013; Li et al., 2012; Suzuki et al., 2014;  
187 Wang et al., 2010; Wang et al., 2012; Zhang et al., 2010a; Zhang et al., 2010b; Zhang et al.,  
188 2010c). Hence, the similarities of these longer genes should be better studied in order to  
189 analyze their significance in altering plant tolerance to stress and/or other important  
190 agronomic traits that may bring interesting insights about H<sub>2</sub>S evolution or that may be of  
191 interest of plant breeders.

192

### 193 **Author Contributions**

194 GA and JR initiated the project. All the authors have made a substantial, direct, intellectual  
195 contribution to the work, and reviewed the final version of the manuscript.

196

### 197 **Conflict of Interest Statement**

198 The authors declare that the research was conducted in the absence of any commercial or  
199 financial relationships that could be construed as a potential conflict of interest.

200

### 201 **Acknowledgments**

202 The authors acknowledge the assistance from Dr. Abdul Baten from Southern Cross Plant  
203 Science, Southern Cross University, Lismore, NSW, Australia in analyzing RNA-seq derived  
204 expression patterns.

205 **References**

206

207 Bloem E., Riemenschneider A., Volker J., Papenbrock J., Schmidt A., Salac I., Haneklaus S.  
208 & Schnug E. 2004. Sulphur supply and infection with *Pyrenopeziza brassica* influence L-  
209 cysteine desulhydrase activity in *Brassica napus* L. *Journal of Experimental Botany* **55**,  
210 2305–2312. doi:10.1093/jxb/erh236

211 Chen, J., Wang, W.H., Wu, F.H., You, C.Y., Liu, T.W., Dong, X.J., He, J.X. and Zheng,  
212 H.L., 2013. Hydrogen sulfide alleviates aluminum toxicity in barley seedlings. *Plant and*  
213 *soil*, 362(1-2), pp.301-318. doi:10.1111/j.1744-7909.2010.00946.x.

214 Chen, Z., Chen, M. and Jiang, M., 2017. Hydrogen sulfide alleviates mercury toxicity by  
215 sequestering it in roots or regulating reactive oxygen species productions in rice  
216 seedlings. *Plant Physiology and Biochemistry*, *111*, pp.179-192.  
217 doi:10.1016/j.plaphy.2016.11.027.

218 Christou, A., Manganaris, G.A., Papadopoulos, I. and Fotopoulos, V., 2013. Hydrogen  
219 sulfide induces systemic tolerance to salinity and non-ionic osmotic stress in strawberry  
220 plants through modification of reactive species biosynthesis and transcriptional regulation of  
221 multiple defence pathways. *Journal of experimental botany*, *64*(7), pp.1953-1966.  
222 doi:10.1093/jxb/ert055.

223 Dai, C., Cui, W., Pan, J., Xie, Y., Wang, J., and Shen, W. 2017. Proteomic analysis provides  
224 insights into the molecular bases of hydrogen gas-induced cadmium resistance in *Medicago*  
225 *sativa*. *Journal of Proteomics* *152*, 109–120. doi:10.1016/j.jprot.2016.10.013.

226 Duan, B., Ma, Y., Jiang, M., Yang, F., Ni, L. and Lu, W., 2015. Improvement of  
227 photosynthesis in rice (*Oryza sativa* L.) as a result of an increase in stomatal aperture and  
228 density by exogenous hydrogen sulfide treatment. *Plant growth regulation*, *75*(1), pp.33-44.  
229 doi:10.1007/s10725-014-9929-5.

230 Li, L., Wang, Y. and Shen, W., 2012. Roles of hydrogen sulfide and nitric oxide in the  
231 alleviation of cadmium-induced oxidative damage in alfalfa seedling roots. *Biometals*, *25*(3),  
232 pp.617-631. doi:10.1007/s10534-012-9551-9.

233 Mishanina, T. V, Libiad, M., and Banerjee, R. 2015. by hydrogen sulfide oxidation  
234 pathways. *Nat. Chem. Biol.* *11*, 1–8. doi:10.1038/nchembio.1834.

235 Mostofa, M.G., Rahman, A., Ansary, M.M.U., Watanabe, A., Fujita, M. and Tran, L.S.P.,  
236 2015a. Hydrogen sulfide modulates cadmium-induced physiological and biochemical  
237 responses to alleviate cadmium toxicity in rice. *Scientific reports*, *5*. doi:10.1038/srep14078.

238 Mostofa, M.G., Saegusa, D., Fujita, M. and Tran, L.S.P., 2015b. Hydrogen sulfide regulates  
239 salt tolerance in rice by maintaining Na<sup>+</sup>/K<sup>+</sup> balance, mineral homeostasis and oxidative  
240 metabolism under excessive salt stress. *Frontiers in plant science*, *6*.  
241 doi:10.3389/fpls.2015.01055.

242 Neale, H, N Deshappriya, D Arnold, and M E Wood. 2017. Hydrogen Sulfide causes  
243 excision of a genomic island in *Pseudomonas syringae* Pv . *Phaseolicola*. *European Journal*  
244 *of Plant Pathology*. <https://doi.org/10.1007/s10658-017-1240-7>

245 Romero, L. C., Aroca, M. Á., Laureano-Marín, A. M., Moreno, I., García, I., and Gotor, C.  
246 2014. Cysteine and Cysteine-Related Signaling Pathways in *Arabidopsis thaliana*. *Molecular*  
247 *Plant* *7*, 264–276. doi:10.1093/mp/sst168.

248 Shi, H., Ye, T., Han, N., Bian, H., Liu, X. and Chan, Z., 2015. Hydrogen sulfide regulates  
249 abiotic stress tolerance and biotic stress resistance in *Arabidopsis*. *Journal of integrative*  
250 *plant biology*, *57*(7), pp.628-640. doi:10.1111/jipb.12302.

251 Suzuki, N., Rivero, R.M., Shulaev, V., Blumwald, E. and Mittler, R., 2014. Abiotic and  
252 biotic stress combinations. *New Phytologist*, 203(1), pp.32-43. doi: 10.1111/nph.12797  
253 Tian, B., Zhang, Y., Jin, Z., Liu, Z., Pei, Y. 2017. Role of hydrogen sulfide in the methyl  
254 jasmonate response to cadmium stress in foxtail millet. *Frontiers in Bioscience* 22, 530–538.  
255 doi:10.2741/4500.  
256 Wang, B.L., Shi, L., Li, Y.X. and Zhang, W.H., 2010. Boron toxicity is alleviated by  
257 hydrogen sulfide in cucumber (*Cucumis sativus* L.) seedlings. *Planta*, 231(6), pp.1301-1309.  
258 doi:10.1007/s00425-010-1134-9.  
259 Wang, R., 2012. Physiological implications of hydrogen sulfide: a whiff exploration that  
260 blossomed. *Physiological reviews*, 92(2), pp.791-896. doi:10.1152/physrev.00017.2011.  
261 Wang, Y., Li, L., Cui, W., Xu, S., Shen, W. and Wang, R., 2012. Hydrogen sulfide enhances  
262 alfalfa (*Medicago sativa*) tolerance against salinity during seed germination by nitric oxide  
263 pathway. *Plant and soil*, 351(1-2), pp.107-119. doi:10.1007/s11104-011-0936-2.  
264 Zhang, H., Hu, L.Y., Li, P., Hu, K.D., Jiang, C.X. and Luo, J.P., 2010a. Hydrogen sulfide  
265 alleviated chromium toxicity in wheat. *Biologia Plantarum*, 54(4), pp.743-747.  
266 doi:10.1007/s10535-010-0133-9.  
267 Zhang, H., Jiao, H., Jiang, C.X., Wang, S.H., Wei, Z.J., Luo, J.P. and Jones, R.L., 2010b.  
268 Hydrogen sulfide protects soybean seedlings against drought-induced oxidative stress. *Acta*  
269 *physiologiae plantarum*, 32(5), pp.849-857. doi:10.1007/s11738-010-0469-y.  
270 Zhang, H., Tan, Z.Q., Hu, L.Y., Wang, S.H., Luo, J.P. and Jones, R.L., 2010c. Hydrogen  
271 sulfide alleviates aluminum toxicity in germinating wheat seedlings. *Journal of Integrative*  
272 *Plant Biology*, 52(6), pp.556-567. doi:10.1111/j.1744-7909.2010.00946.x.  
273  
274  
275  
276  
277  
278  
279  
280  
281  
282  
283  
284  
285  
286  
287  
288  
289  
290  
291  
292  
293  
294  
295

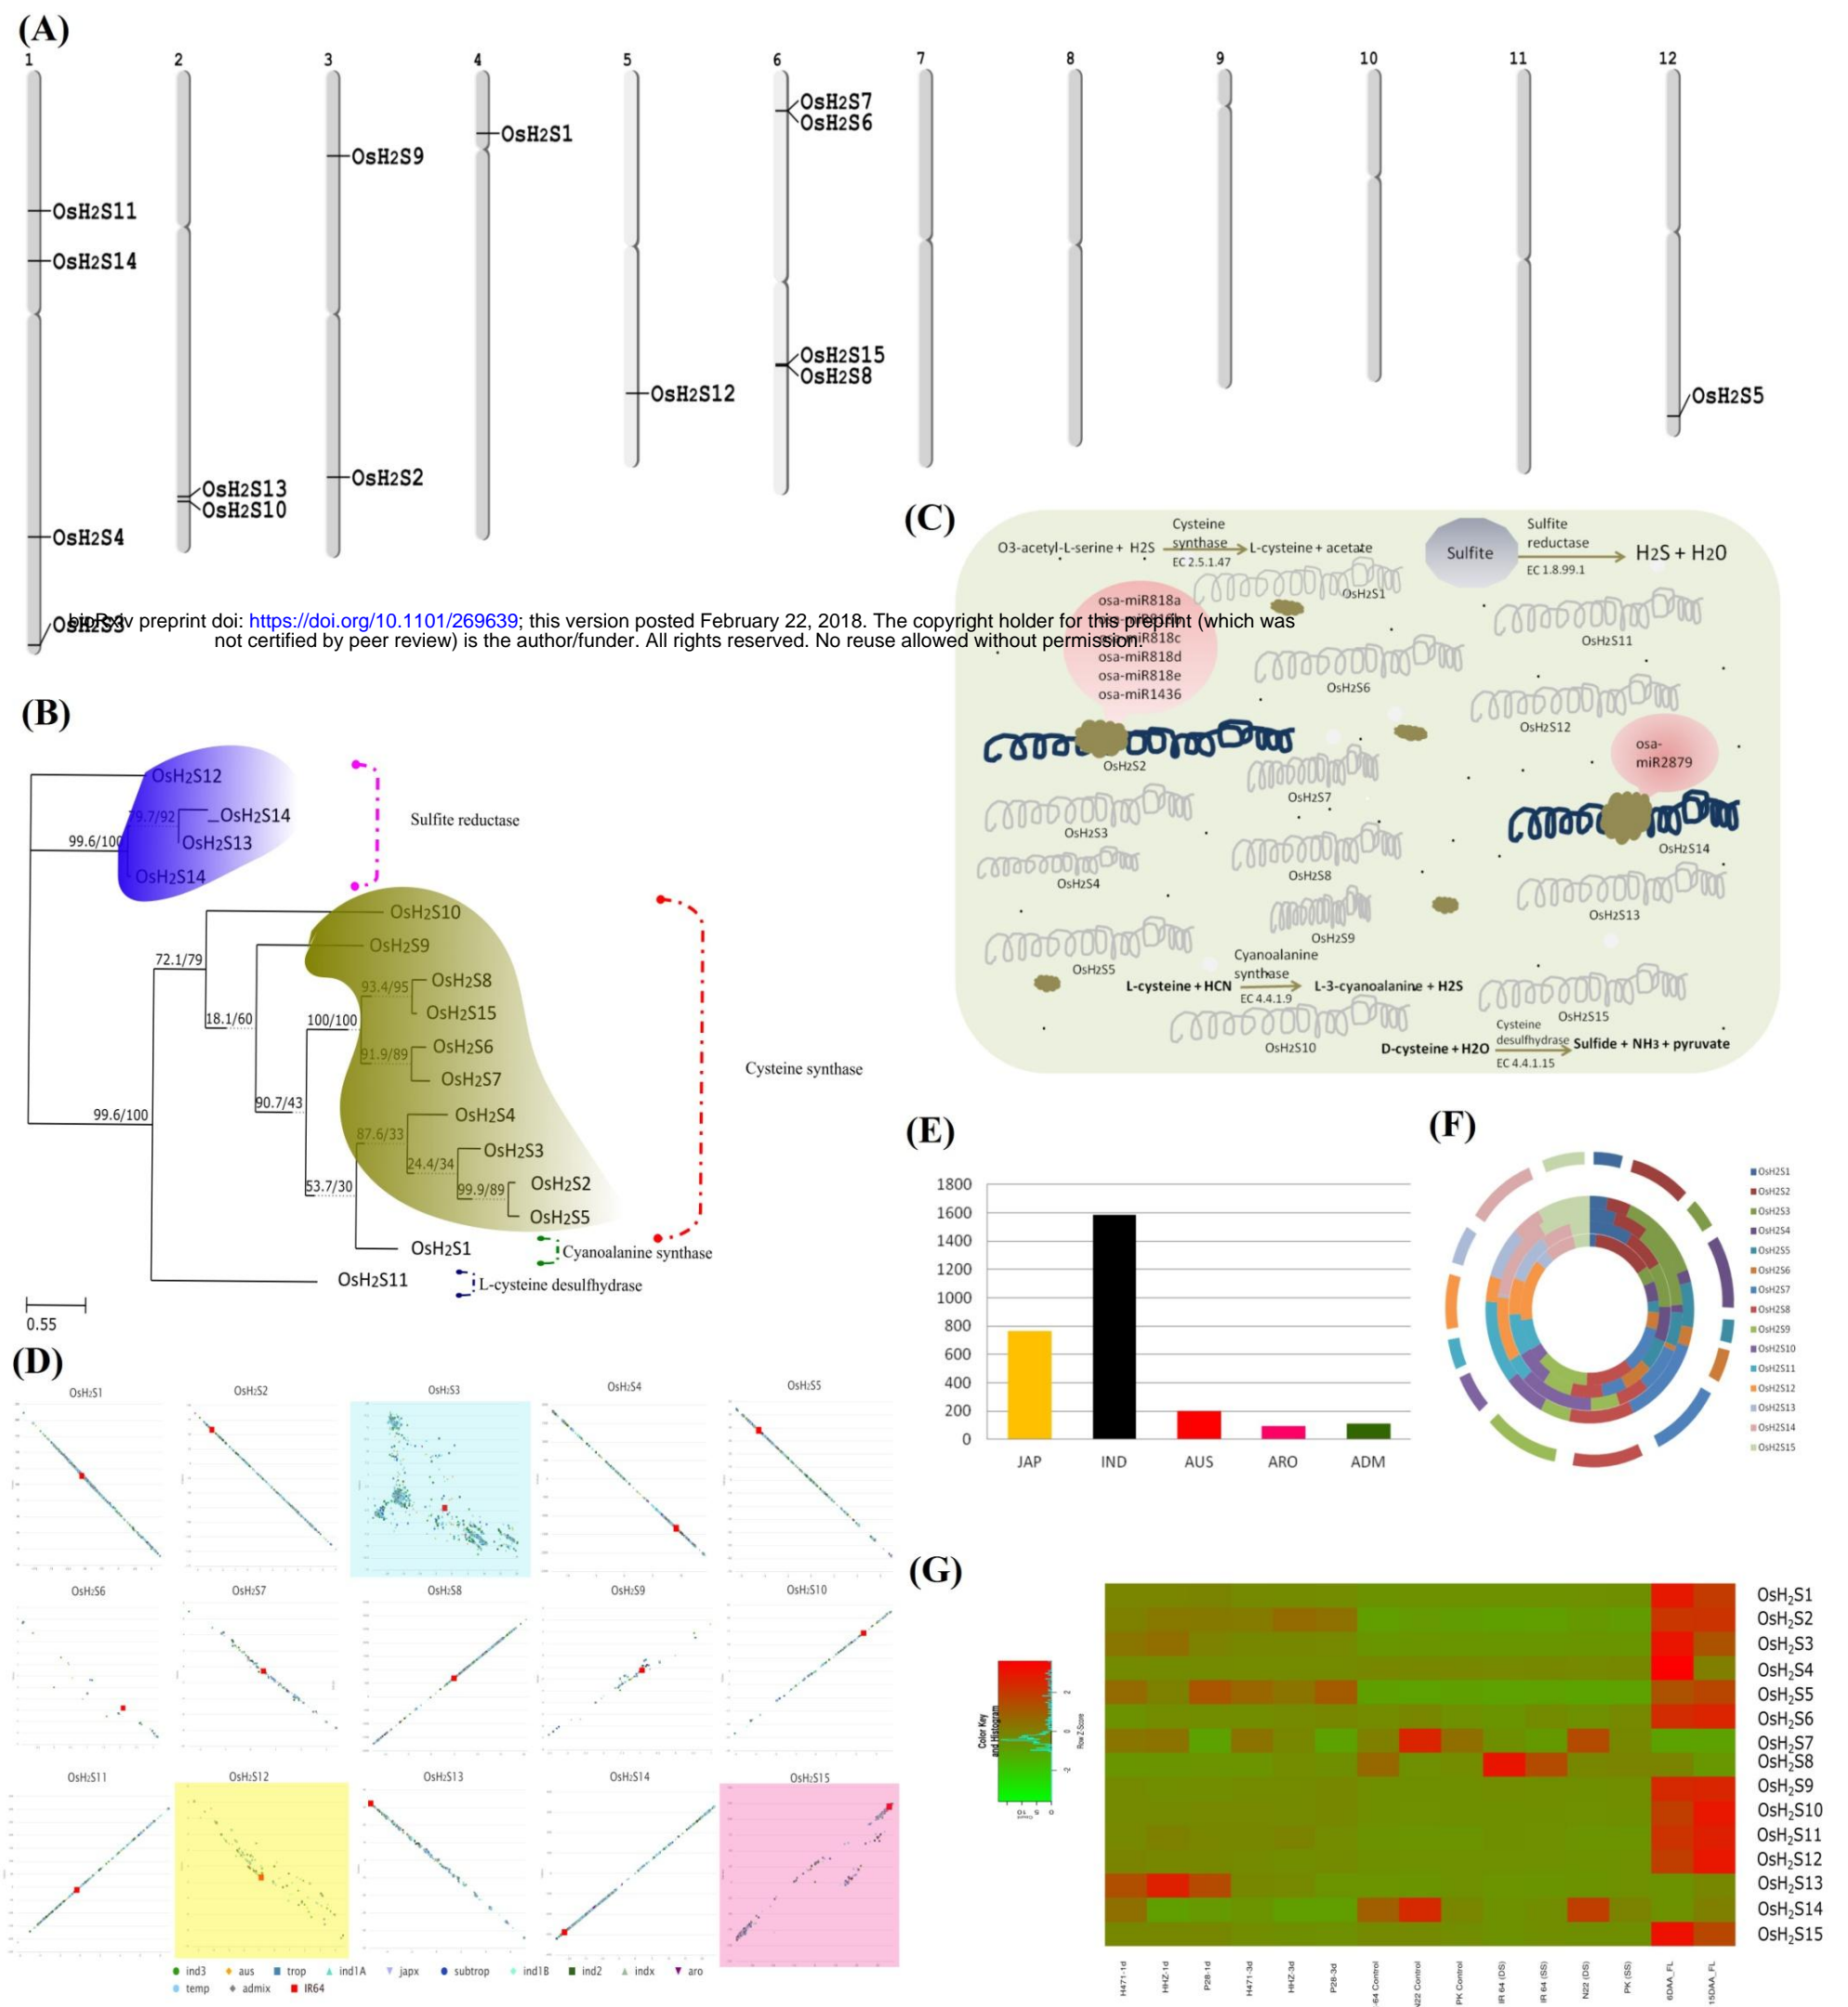

**Figure 1: Genome-wide characterization of H<sub>2</sub>S homeostasis genes in rice.** (A) Chromosomal positioning and distribution of genes. H<sub>2</sub>S genes were identified using a combined computational approaches in rice, i.e., key word search, conserved domain identification, Pfam identifier and HMMER search. Chromosomal positioning was based on the physical position (Mb) in 12 rice chromosomes. The chromosome number is indicated at the top of each chromosome. (B) The evolutionary history was inferred by using the Maximum Likelihood method based on W-IQ-TREE. The bootstrap consensus tree inferred from 1000 replicates is taken to represent the evolutionary history of the taxa analyzed (Felsenstein, 1985). The resulting four major clusters were shown in the figure. The analysis involved 15 amino acid sequences. All amino acid sequences in this study have been manually annotated in FGENESH to avoid the redundancy. (C) miRNA scanning and target prediction. The full-length nucleotide sequences were subjected to verify the presence of miRNA targets. Of 15 H<sub>2</sub>S gene, only two gene sequence had a potential miRNA binding site. Interestingly, the gene OsH<sub>2</sub>S2 has a single binding site for six marinas. (D) Pan-genome analysis in ~3k rice genome sequence data. The pan-genome analysis revealed the possible and potential H<sub>2</sub>S alleles across wide rice accessions. The data in this study are obtained from Rice SNP seek database. The genetic relatedness among these accessions is drawn based on the variations in any particular H<sub>2</sub>S gene. IR-64 variety is highlighted in gene based genetic diversity analysis (E) The distribution of all 15 H<sub>2</sub>S homeostasis genes in wide rice accessions. The graph indicates the number of any particular rice type having all 15 H<sub>2</sub>S. The results show that maximum number of *Indica* type rice possess all H<sub>2</sub>S homeostasis genes. (F) The distribution of stress related transcription factors in the 2kb upstream nucleotide sequences. The five rings in the figure indicate the five transcription factor. From outer side, ring 1- Bzip, ring 2- NAC, ring 3- WRKY, ring 4- MYB and ring 5- AP2/EREBP. (G) Functional characterization of H<sub>2</sub>S homeostasis genes. Heatmap showing the expression of H<sub>2</sub>S genes under salinity and drought stress. The FPKM value is calculated from the RNA-seq data derived from the whole genome transcriptome study under salinity and drought stress. The colored bar at the left indicates the relative expression value, wherein, -2.0, 0.0 and 2.0 indicates low, medium and high expression respectively.



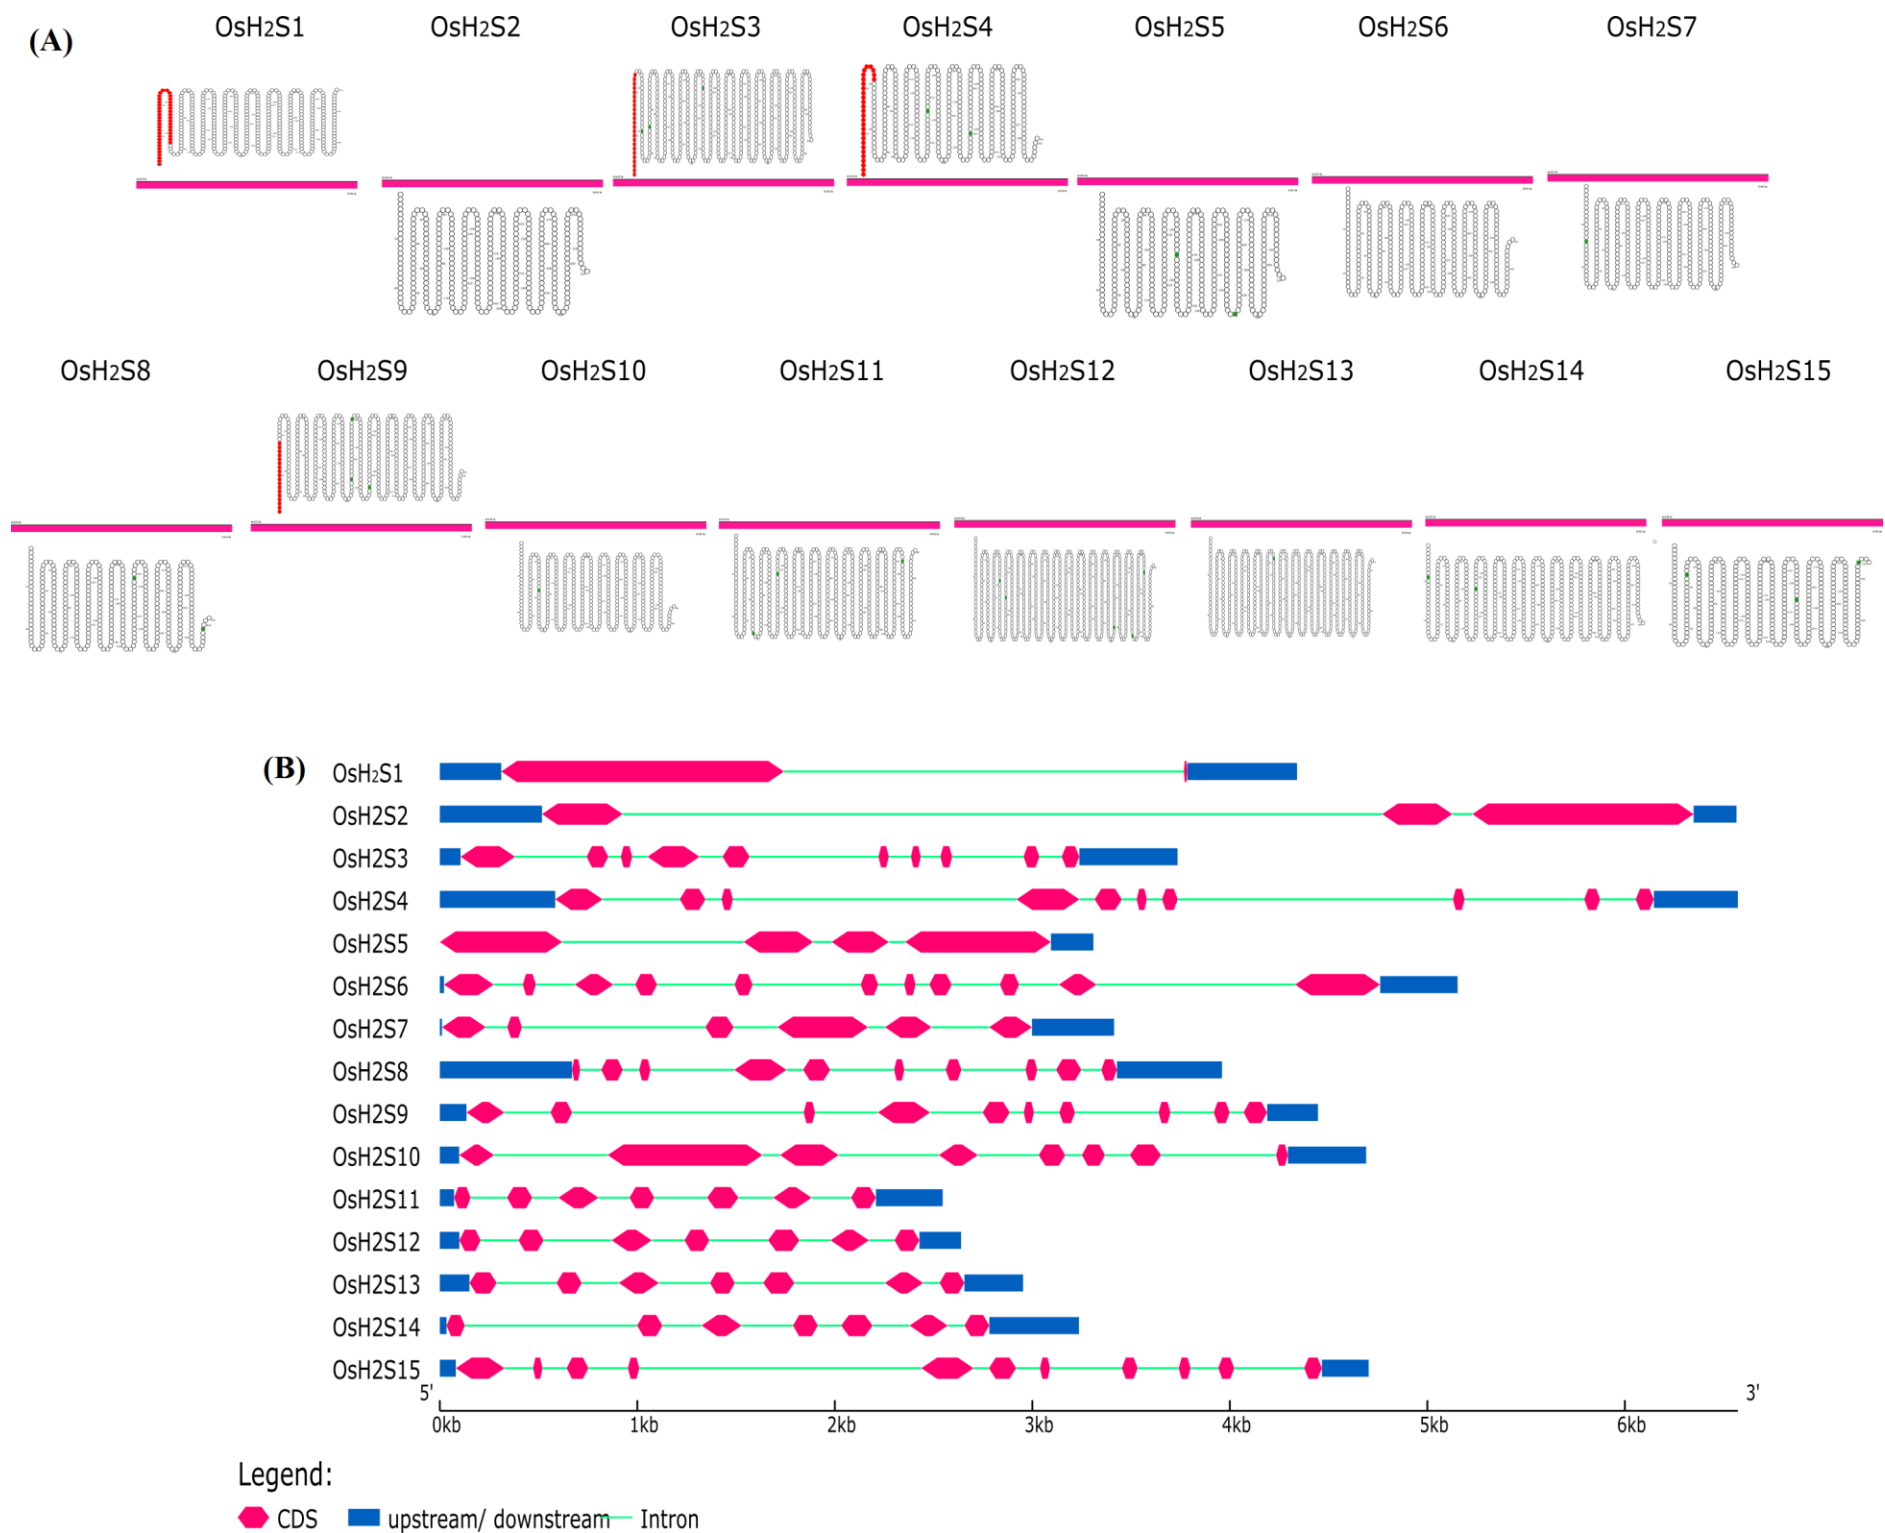

**Figure 2: H<sub>2</sub>S protein membrane topology and gene structure.** (A) Signal peptide prediction and orientations of membrane-spanning segments with respect to the inner and outer sides of the plant cell plasma membrane. The pink colored peptide chain at the end of N-terminus indicates the presence of signal-peptide in the H<sub>2</sub>S homeostasis gene (B) representation of the presence and arrangements of number of introns/exons in the genes.
